# Supplementary material for: Pan-cancer multi-omics analysis and orthogonal experimental assessment of epigenetic driver genes
Source: HighWire-hosted journal article supplement (doi:10.1101/gr.268292.120), 2020-09-22
Supplement: Supplemental_Fig_S16.pdf [file Supplemental_Fig_S16.pdf]

A

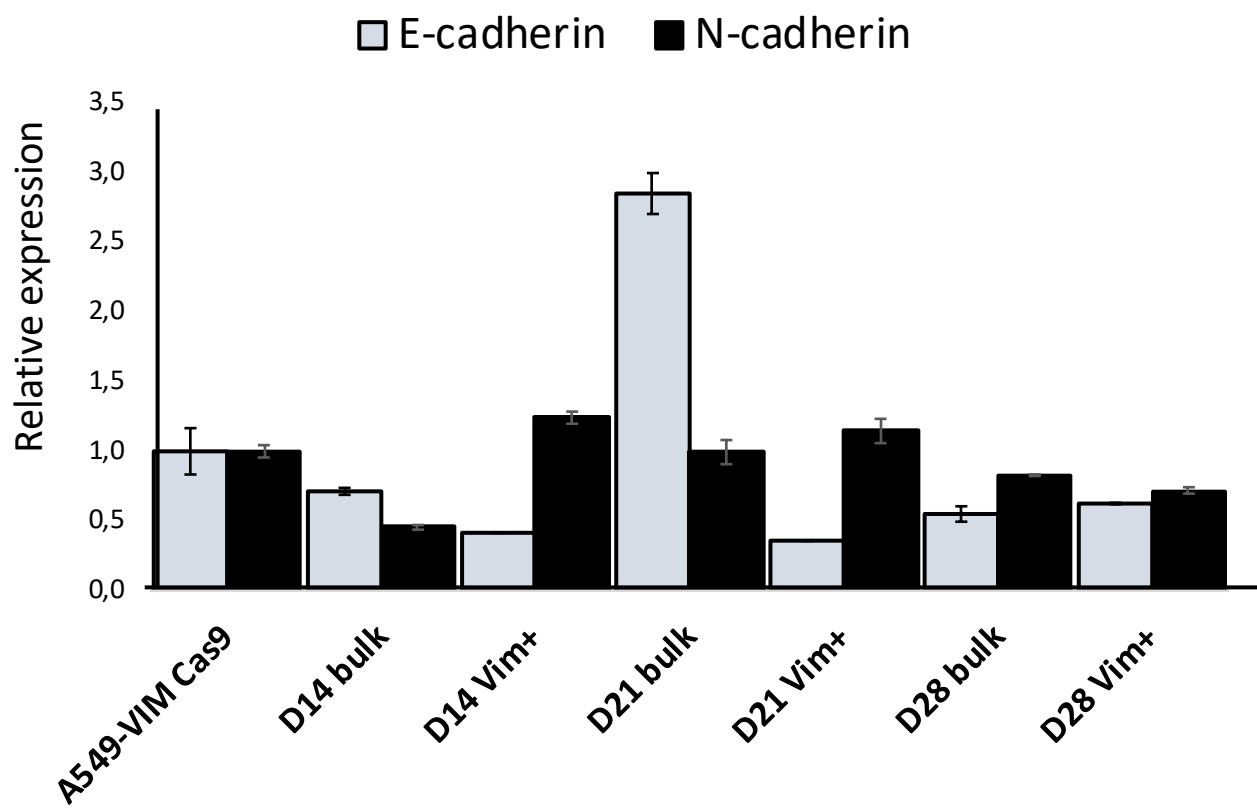

B

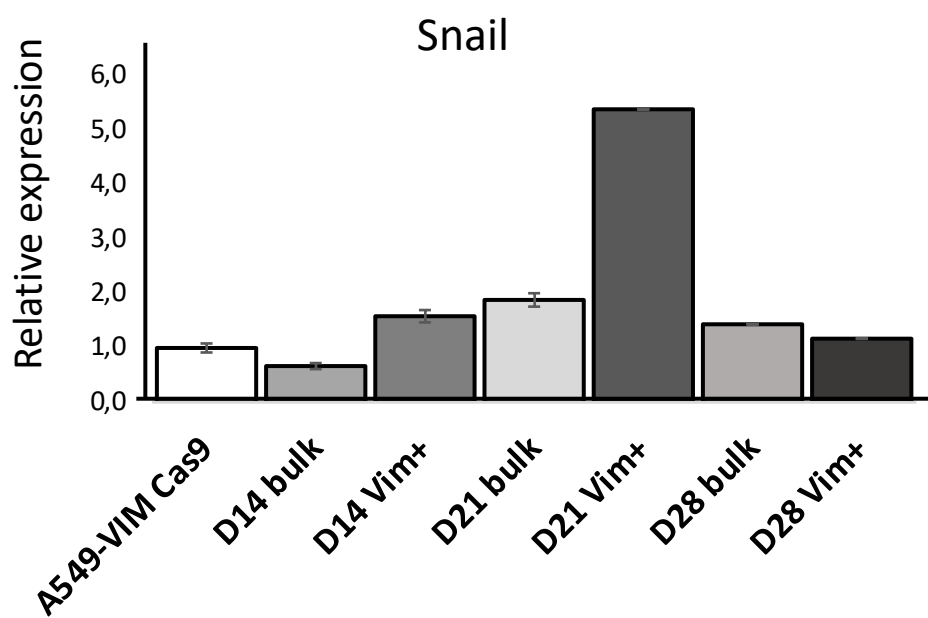

C

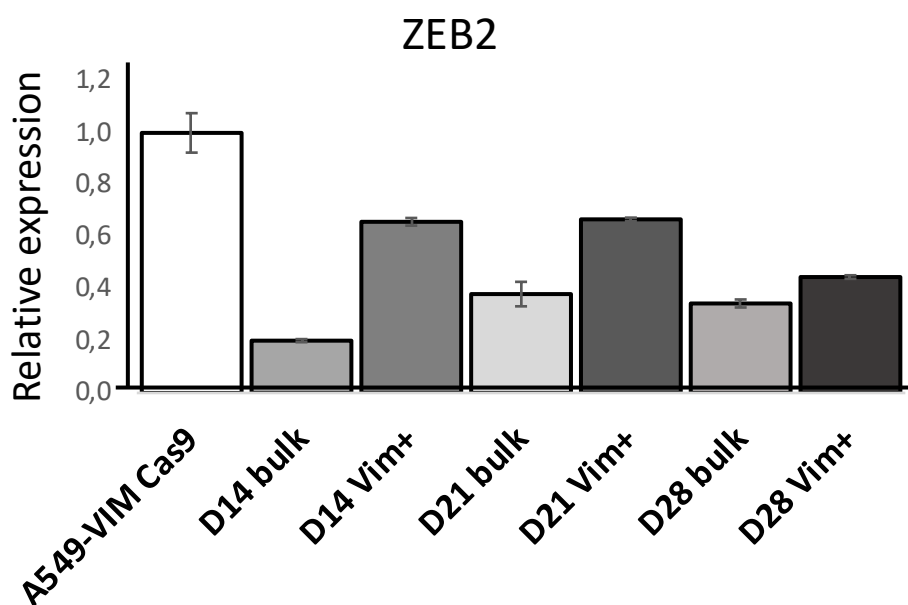

**Supplemental Figure S16.** Expression analysis of (A) E-Cadherin and N-Cadherin (B) Snail and (C) ZEB2 performed by qRT-PCR on A549-Vim Cas9 transfected cells by CRISPR ERG library (bulk) and A549-Vim Cas9 transfected by CRISPR ERG library after sorting for Vimentin positive (Vim+) cell populations at different time points compared to the parental A549-Vim Cas9 cell line.
