# Supplementary material for: Pan-cancer multi-omics analysis and orthogonal experimental assessment of epigenetic driver genes
Source: HighWire-hosted journal article supplement (doi:10.1101/gr.268292.120), 2020-09-22
Supplement: Supplemental_Fig_S17.pdf [file Supplemental_Fig_S17.pdf]

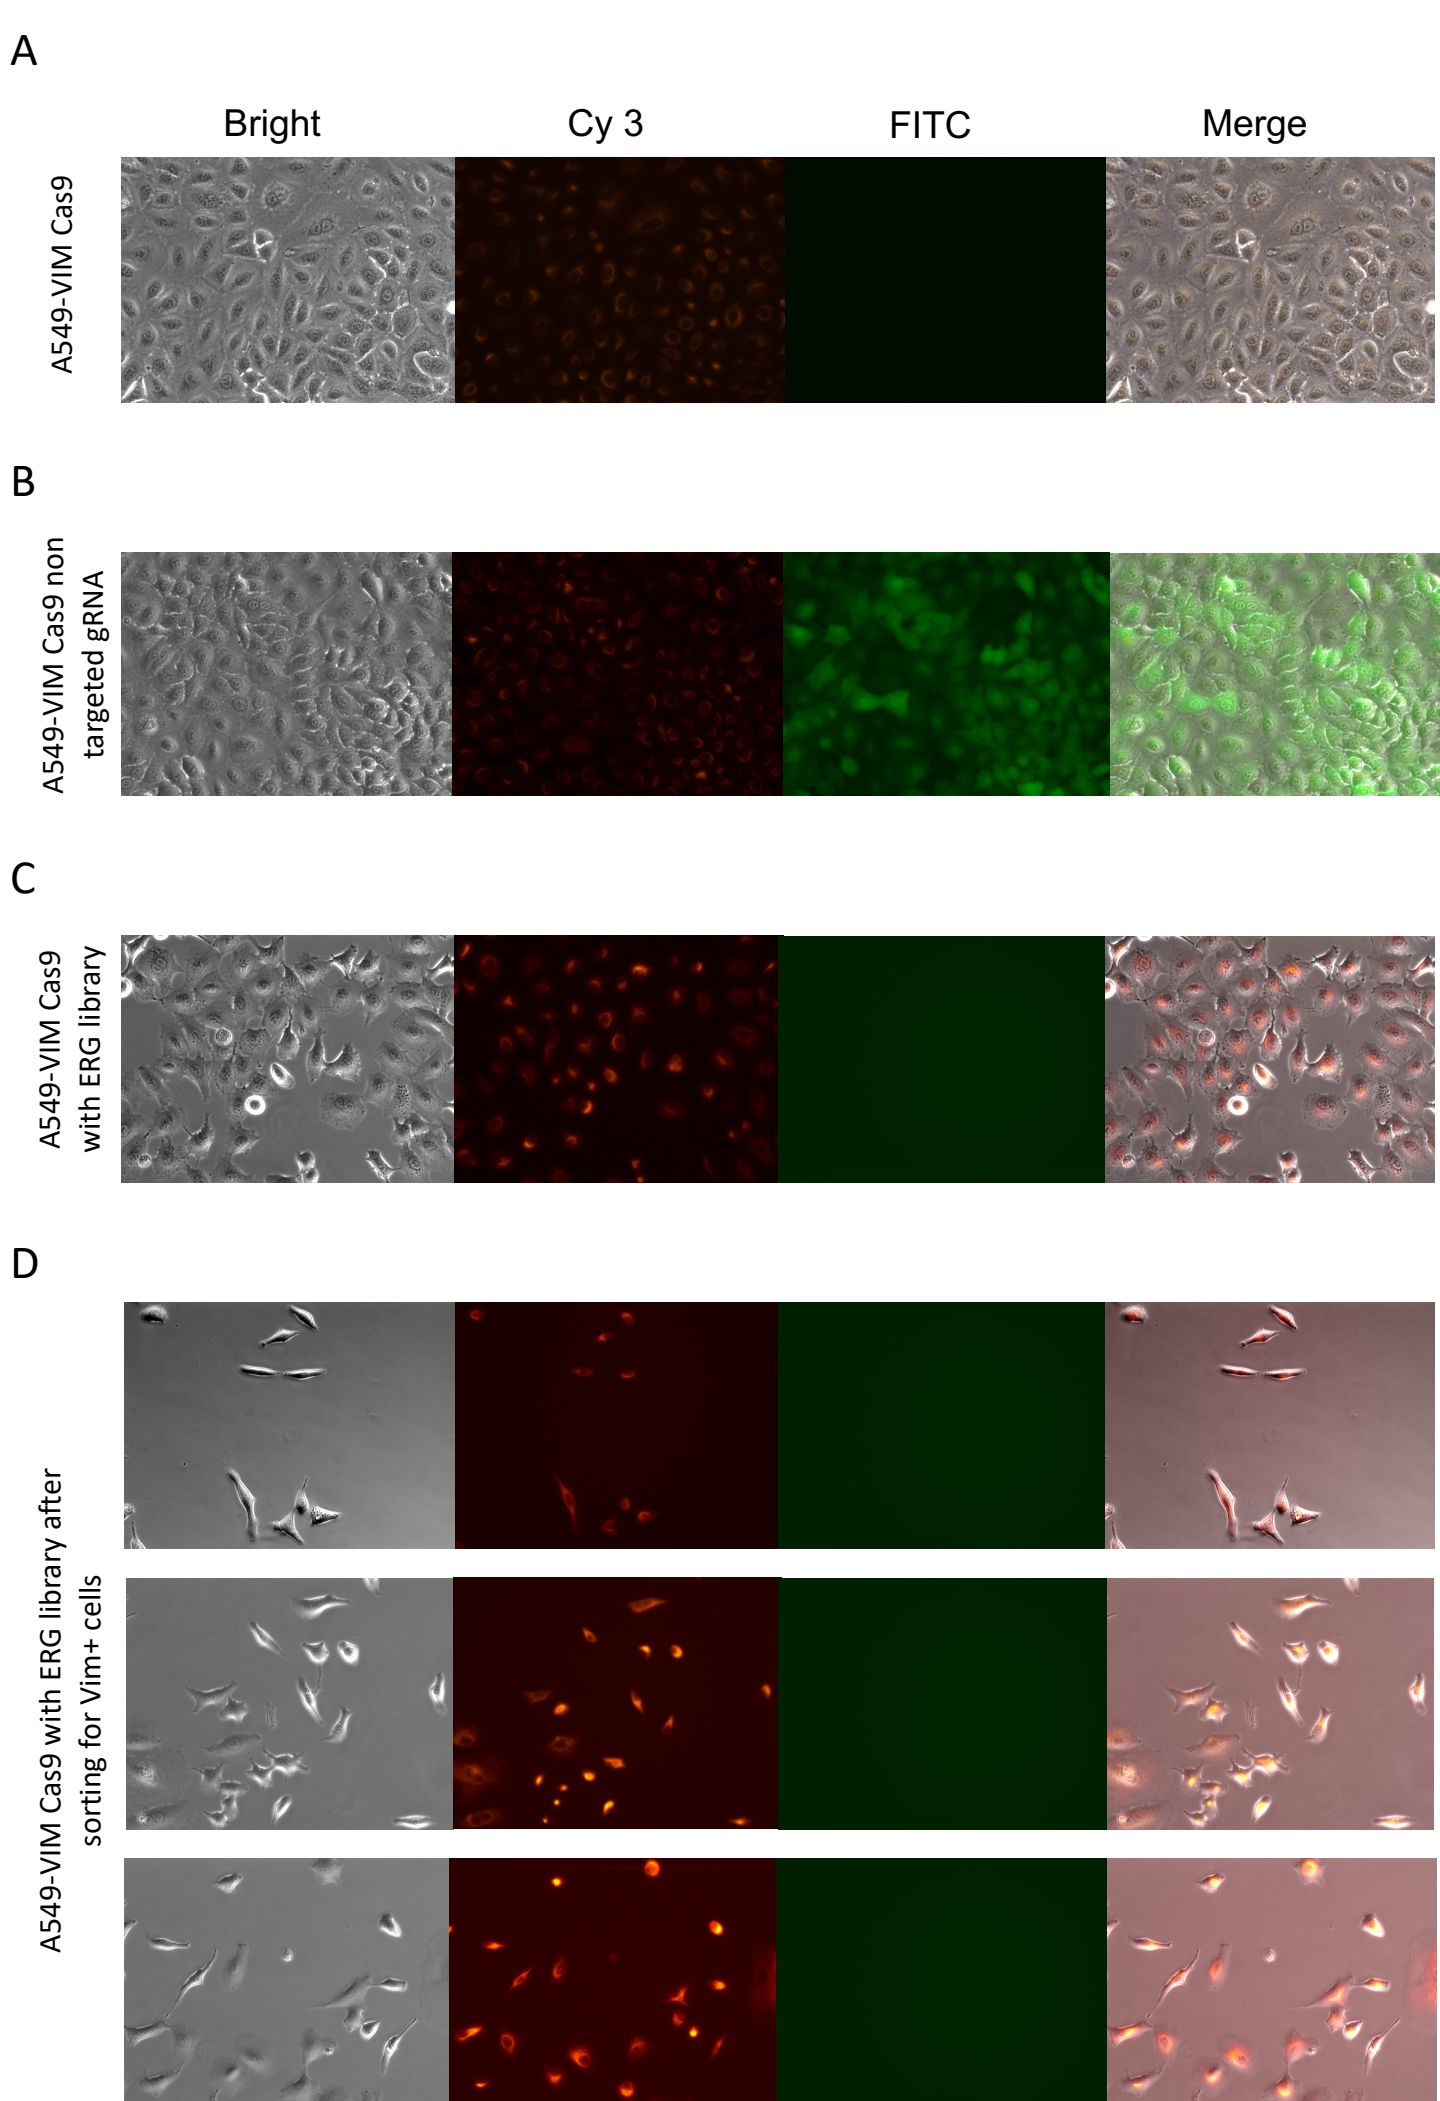

**Supplemental Figure S17.** Fluorescence microscopy in bright, red and green field and merge images of (A) non transfected A549-VIM Cas9 the parental cell lines, (B) A549-VIM cas9 transfected with non targeted gRNA sequence (control negative), (C) A549-Vim Cas9 transfected cells by CRISPR ERG library (bulk), (D) A549-Vim Cas9 transfected by CRISPR ERG library after sorting for Vimentin positive (Vim+) cell populations.
